# Supplementary material for: Predictive performance of genomic selection methods for carcass traits in Hanwoo beef cattle: impacts of the genetic architecture
Source: PubMed Central journal article supplement (PMC5240470; doi:10.1186/s12711-016-0283-0), 2017-01-04

**BT**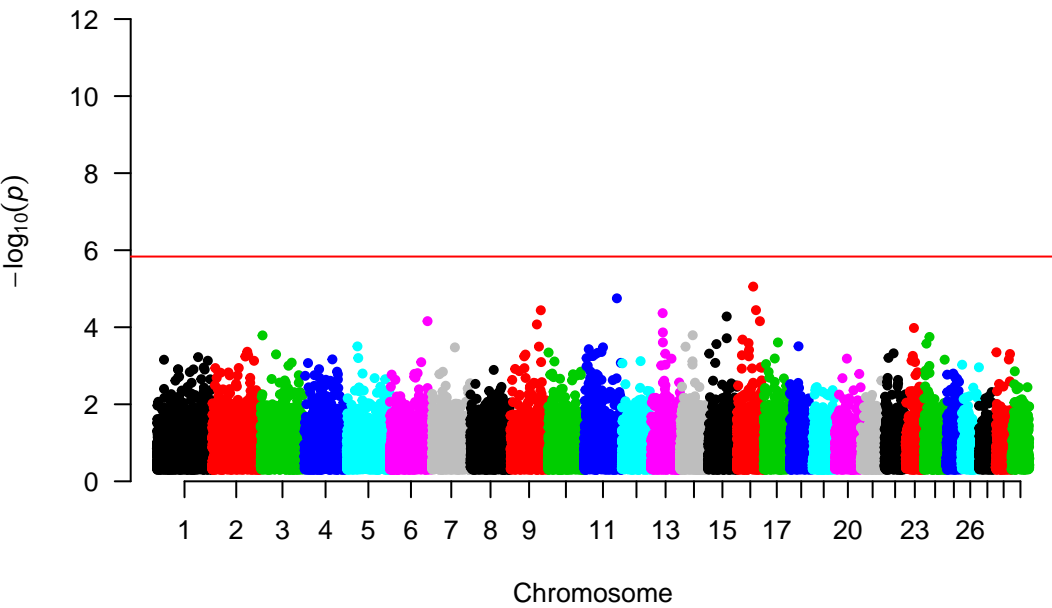**CW**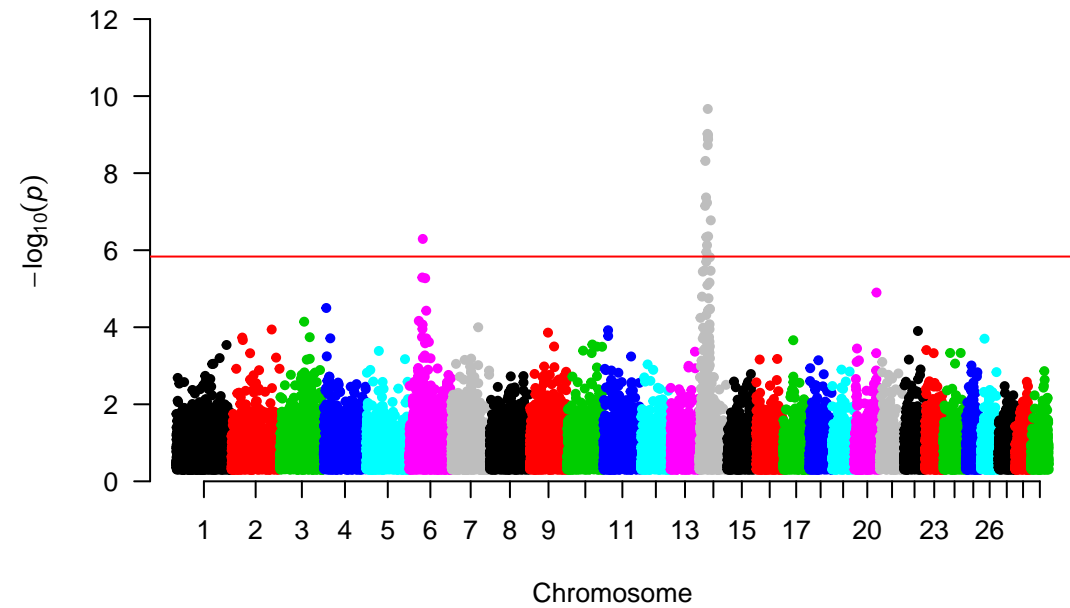**EMA**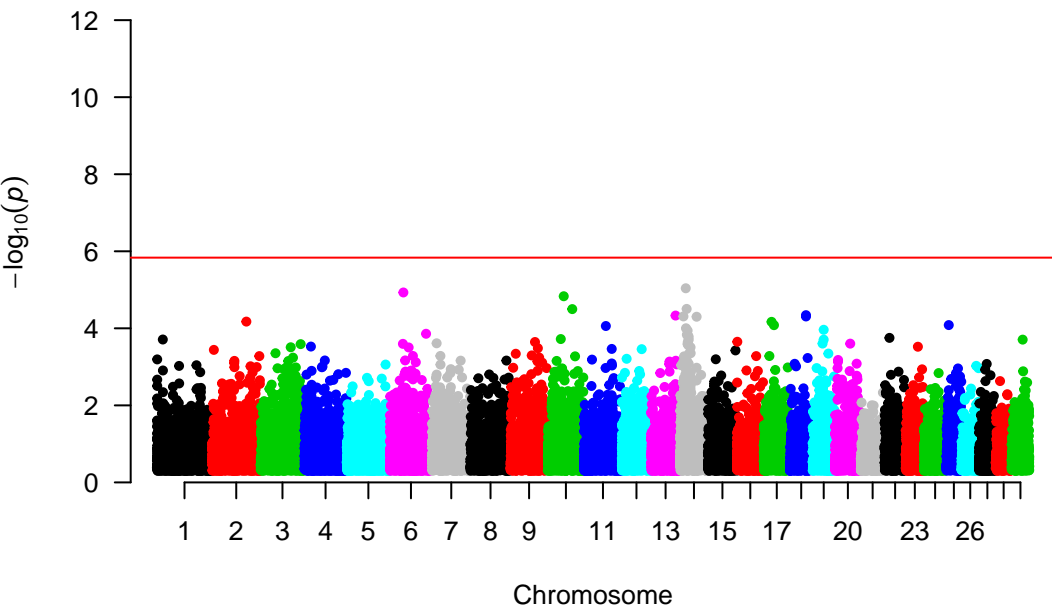**MS**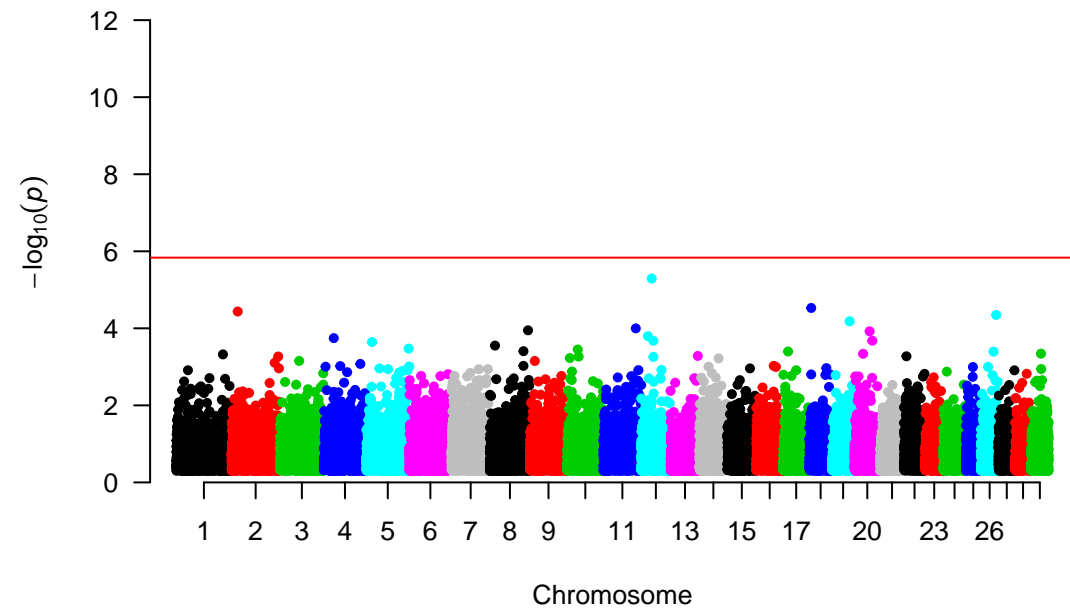

Supplement: 12711_2016_283_MOESM3_ESM.pdf [file 12711_2016_283_MOESM3_ESM.pdf]
